1 **Breast and cervical cancer screening among women at reproductive age in**  
2 **Cambodia: A Secondary Analysis of Cambodia Demographic and Health**  
3 **Survey 2022**

4 Samnang Um<sup>1,\*</sup>, Heng Sopheab<sup>1‡</sup>

5  
6 National Institute of Public Health, Phnom Penh, Cambodia

7  
8 ‡ SH also contributed equally to this work.

9 \* [umsamnang56@gmail.com](mailto:umsamnang56@gmail.com)

10

11 **Abstract**

12 Breast and cervical cancers are the most prevalent diagnosed in women worldwide, significantly  
13 contributing to maternal morbidity and mortality. We examined socio-demographic and behavioral factors  
14 associated with breast and cervical cancer screening among Cambodian women aged 15-49 years old. We  
15 analyzed women's data from the 2022 Cambodia Demographic and Health Survey (CDHS). In total,  
16 19,496 women were interviewed. Multiple logistic regression was performed using STATA V17 to  
17 examine factors associated with breast and cervical cancer screening. The proportion of breast and  
18 cervical cancer screenings was 10.6% and 15.3%, respectively. After being adjusted, factors  
19 independently associated with breast cancer screening included age group 20-29 years [AOR=2.51; 95%  
20 CI: 1.55-4.06], 30-39 years [AOR=4.34; 95% CI: 2.66-7.09], and 40-49 years [AOR=4.66; 95% CI: 2.81-  
21 7.71], higher education [AOR=1.92; 95% CI: 1.26-2.93], exposure media [AOR=1.66; 95% CI: 1.32-  
22 2.10], and rich wealth quintile [AOR=1.50; 95% CI: 1.25-1.80]. Similarly, the odds of having cervical  
23 cancer screening were age group 20-29 years [AOR=2.88; 95% CI: 1.76-4.71], 30-39 years [AOR=5.94;  
24 95% CI: 3.58-9.83], and 40-49 years [AOR=7.61; 95% CI: 4.55-12.73], higher education [AOR=1.55; 95%  
25 CI: 1.55-2.73], exposure media [AOR=1.62; 95% CI: 1.35,1.95], and rich wealth quintile [AOR=2.14; 95%  
26 CI: 1.78-2.58]. In conclusion, this study shows the low screening proportion for both breast and cervical  
27 cancers, and it also highlights that socio-economic factors are significantly important in determining the  
28 health care seeking for these two main cancer screening services among women aged 15-49 years in  
29 Cambodia. Therefore, increase of exposure media with health education focusing on these cancer  
30 screenings should be made better accessible to women, particularly those of low socio-economic status.

31

32 **Keywords:** Cervical cancer, Breast cancer, Screening, Women, Cambodia Demographic and  
33 Health Survey

34

## 35 **Introduction**

36

37 Cancer is the most significant public health problem worldwide, with approximately 18.1 million  
38 cases (8.8 million in women) and 10 million cancer-related mortality reported in 2020 [1].  
39 Globally, breast and cervical cancers are the most prevalent diagnosed in women [2], especially  
40 since cervical cancer is a relatively more significant problem in low and middle-income  
41 countries (LMICs) than breast cancer [3]. According to estimates, cervical cancer accounted for  
42 more than 604,000 new cases and 342,000 deaths globally in 2020 [4], while breast cancer  
43 affected over 2.3 million women and resulted in 685,000 deaths; these most diagnosed cancers  
44 worldwide in women at any age after puberty, but with increasing rates when women get older  
45 [4,5]. Evidence suggests that early diagnosis is pivotal in preventing and intervening in these  
46 cancers [6]. Early community-based screening and awareness programs have been in place in  
47 many developed countries, such as the United States, Finland, Sweden, France, and Japan [7-10].  
48 Recently, national screening programs for cervical cancer have been widely provided in Asian  
49 countries, including China, Indonesia, Japan, Korea, and Thailand [11]. However, breast cancer  
50 screening as a national program has been slowly implemented due to the limited availability of  
51 screening guidelines across Asia, access barriers, budgeting constraints, stigma, fear of diagnosis,  
52 limited knowledge of breast self-examination, and cultural concerns [5,12].

53

54 Evidence from LMICs such as Cambodia indicates that incomplete treatment and insufficient  
55 follow-up are the leading causes of the low proportion of breast and cervical cancer screening,  
56 with late detection resulting in high mortality. Other significant contributing factors have  
57 included social stigma, negligence, improper referral pathways, a lack of essential health  
58 infrastructure facilities, and ineffective treatment [13,14]. In these settings, there are surprisingly  
59 few feasible and easily accessible screening programs despite the rising number of instances of  
60 breast and cervical cancers. With limited resources, many countries have adopted varying ages  
61 for breast and cervical cancer screenings. For instance, the minimum recommended age for  
62 breast cancer screening in Vietnam is 20 years, 30 years in India, 35 years in Sri Lanka, and 40  
63 years each in China and Pakistan [15-18]. In the case of cervical cancer, China recommends 18  
64 years as the minimum age for screening, while it is 20 years in Korea, 30 years each in India and  
65 Indonesia, and 35 years in Thailand [11]. Despite these guidelines, the screening prevalence is

66 still low. For instance, cervical cancer screening ranges from 7.3% in Indonesia to 22.3% in India.  
67 Lack of screening knowledge, with socio-demographic, economic, cultural, and structural  
68 barriers are the main determinant for low screening in LMICs [19]. In Cambodia, breast and  
69 cervical cancers are remarkably rising in women in which the burden of breast cancer was 18.9%  
70 (1,877 cases), and cervical cancer was 11.4% (1,135 cases) reported in 2020 [1]. The age-  
71 standardized incidence rate (13.5 per 100,000 women) and the mortality rate (10.1 per 100,000  
72 women) are much higher than regional and global estimates [1]. The recent data from CDHS  
73 2021-22 have shown that only 11% of women aged 15-49 reported that healthcare had ever  
74 examined them to check for breast cancer and 15% reported that they had been tested for cervical  
75 cancer [20]. Breast and cervical cancers are increasing and become a public health problem [20].  
76 Given these public health concerns, the breast and cervical cancers were included in the disease  
77 priority list in the National Strategy for the Prevention and Control of Non-Communicable  
78 Diseases (NCDs) 2007-2010 [21]. In 2008, the Cambodian Ministry of Health (MoH) issued a  
79 national guideline recommend for cervical cancer screening with visual inspection with acetic  
80 acid (VIA) for all sexually active women at every two years and immediate treatment with  
81 cryotherapy "e.g. screen and treat"). The new national action plan for cervical cancer prevention  
82 and control 2019-2023, has integrated HPV vaccination into the national program to support the  
83 prevention of cervical cancer in Cambodia [22]. Also, the new national action plan has addressed  
84 the screening methods for breast cancer including breast self-examination, and physical  
85 examination and mammography. However, it is expensive to test for Human papillomavirus  
86 (HPV), and it is less sensitive and less accurate than polymerase chain reaction (PCR)-based  
87 test used in more affluent settings [23]. Therefore, Cambodia has limited resources for  
88 implementing its strategic plan since it still has many competing healthcare priorities, including  
89 infectious diseases, NCD, universal health coverage and quality of health [23]. In 2017-2018,  
90 there was an HPV vaccine campaign demonstration project to administer two doses of bivalent  
91 HPV vaccine to all 9-year-old girls residing in Svay Rieng and Siem Reap provinces; however, it  
92 is not yet widely available in Cambodia [24,25].

93  
94 According to existing literature, factors associated with cervical and breast screening among  
95 women include higher socioeconomic position (education, occupation and income) [26-29],  
96 ethnicity, age, marital status, media exposure [29], increased access to health care [27]; covered

97 by health insurance [29,30], urban residence [26,29], positive lifestyle behaviors such as physical  
98 activity and fruit and vegetable consumption [30], cultural taboos, stigma, geographic conditions,  
99 and gender inequality [29]. In the context of limited resource countries such as Cambodia, in this  
100 study we use the social determinants of health theoretical framework as the potential factors  
101 influence women awareness and utilization of health services such as breast and cervical cancer  
102 screening [31]. To our knowledge, very limited research has been observed in the area of breast  
103 and cervical cancer screening and its associated risk factors among Cambodian women. Thus,  
104 this paper aimed to assess the breast and cervical cancer screening services linked to women  
105 aged 15-49 and its determinants.

106

## 107 **Materials and methods**

108

### 109 **Data sources**

110

111 We used existing women's data from the latest 2022 CDHS, a nationally representative  
112 population-based household survey implemented by the National Institute of Statistics (NIS) in  
113 collaboration with MoH. Data was collected from September 15, 2021, to February 15, 2022 [20].  
114 Two-stage stratified cluster sampling was used to collect the samples. First, selected 709 clusters  
115 or enumeration areas (EAs) stratified by urban-rural using probability proportional to cluster size.  
116 Second, selected 25-30 households in each EA using systematic sampling. In total, 19,496  
117 women aged 15-49 were interviewed face-to-face, using the survey questionnaire, covering  
118 socio-demographic characteristics, alcohol drinking, tobacco use, household assets maternal  
119 health-related indicators and nutritional status, and data on breast and cervical cancer screening  
120 by healthcare providers [20]. The response rate was reported to be 98.2%. Overall, 254 women  
121 reported missing for breast and cervical cancer screening were excluded. Data restriction resulted  
122 in a final analysis with 19,251 weighted samples of women.

123

124

### 125 **Measurements**

126

### 127 **Outcome variables**

128

129 The two separate outcome variables consisting of breast cancer and cervical cancer screening  
130 were defined based on the question ‘Has a doctor or other healthcare provider examined your  
131 breasts to check for breast cancer, and ‘Has a doctor or other healthcare worker ever tested you  
132 for cervical cancer?’ Then the two outcomes were coded as binary variables with Yes =1 to  
133 indicate cancer screening, and No = 0 to indicate otherwise, respectively.

134

### 135 **Independent variables**

136 Independent variables consisted of socio-demographic characteristics and behavioral factors:  
137 Women’s age in years (15-19, 20-29, 30-39, and 40-49), marital status (never-married, currently  
138 married, and formerly married), education (no education, primary, secondary, and higher),  
139 occupation (not working, professional/formal, and non-professional/informal), and household  
140 wealth index reflected to the household assets and dwelling characteristics was categories as  
141 poorest, poorer, medium, richer, and richest. Provinces were grouped into four geographical  
142 regions (Plains, Tonle Sap, Coastal/sea, and Mountains) and place of residence (rural vs. urban  
143 [20]). Health insurance coverage (yes vs. no), health facility visits within the past year (yes vs.  
144 no), number of children ever born (no children, one-two children, three or more children).  
145 Current smoking was measured at the time of the survey (non-smoker vs. smoker, including daily  
146 smoker and occasional smoker). Alcohol consumption in the last 30 days (never drink, ever drink,  
147 and current drink which corresponds to one can or bottle of beer, one glass of wine, or one shot  
148 of spirits in the last 30 days, and contraceptive uses (hormonal methods and non-hormonal and  
149 traditional methods). Media exposure variables were “frequency of reading magazine or  
150 newspaper”, “frequency of listening to radio”, and “frequency of watching television”, which  
151 were used to calculate the “media exposure score”. Each variable was coded as 0 = not at all, 1 =  
152 less than once a week, and at least once a week; the computed “media exposure” index ranged  
153 from 0 to 3 and was categorized as (0 = no exposure media, 1 = one type of media, and 2 = two  
154 and more types of media). Body mass index (underweight ( $< 18.5 \text{ kg/m}^2$ ), normal weight  
155 ( $18.5\text{-}24.9 \text{ kg/m}^2$ ), overweight, and obesity ( $\geq 25.0 \text{ kg/m}^2$ ).

156

### 157 **Statistical analysis**

158 Statistical analyses were performed using STATA version 17 (Stata Crop 2019, College Station,  
159 TX). We accounted for CDHS sampling weight and complex survey design using the *survey*

160 *package* in our descriptive and logistic regression analyses. Key socio-demographic  
161 characteristics and behavioral factors were described using weighted frequency. Continuous  
162 variables were calculated as mean (SD) such as women age. Bivariate analysis with chi-square  
163 tests was used to assess the association between the variables of interest (socio-demographic  
164 characteristics and behavioral factors) and breast and cervical cancer screening separately.  
165 Variables associated with breast and cervical cancer screening with at  $p\text{-value} \leq 0.10$  were  
166 included in the multiple logistic regression analysis to determine the independent factors  
167 associated with the screening for breast and cervical cancer [32]. Multicollinearity between  
168 independent variables was checked including women's age, number of children ever born,  
169 education, wealth index, occupation, marital status, and place of residence. Variance inflation  
170 factor (VIF) scores were 1.53 indicated no collinearity concerns [33].

171

## 172 **Ethical consideration**

173

174 The study used women's data extracted from the most recent CDHS 2022 publicly available and  
175 granted through the DHS program (<https://dhsprogram.com/data/available-datasets.cfm>) with all  
176 removed personal identifiers. Written informed consent was obtained from the parent/guardian  
177 of each participant under 18 years of age before data collection. The Cambodia National Ethics  
178 Committee for Health Research approved the data collection tools and procedures for CHDS  
179 2022 on 10 May 2021 (Ref # 83 NECHR) and ICF's Institutional Review Board (IRB) in  
180 Rockville, Maryland, USA.

181

## 182 **Results**

183

### 184 **Characteristics of the study samples**

185

186 Women's socio-demographic characteristics and behavioral factors are described in **Table 1**. The  
187 mean age was slightly close to 31 years old (SD = 9.5 years); the age group 30-49 years old  
188 accounted for 56.3%. More than 69.0% were currently married. Close to 43.0% of women  
189 worked in non-professional or informal jobs, and 27.2% were unemployed. Half of the women  
190 completed at least secondary education, while 11.5% had no formal education. Over one-fourth

191 of women (26.9%) had three or more children. Close to one fourth of them (24.2%) reported  
 192 using hormonal contraceptives. Over half (53.6%) of the women did not have exposure to media,  
 193 and 28.7% were overweight and obese. Less than 2.0% of them reported cigarette smoking, and  
 194 16.20% currently drink alcohol. Of the total sample, 35.3% of women were from poor  
 195 households. Over half (57.5%) of the women resided in rural areas.

196

197 **Table 1.** Socio-demographic and behavioral characteristics of the weighted samples of women  
 198 aged 15-49 years old in Cambodia, 2022 (N = 19,251)

199

| <b>Variables</b>                              | <b>Freq.</b>      | <b>Percent</b> |
|-----------------------------------------------|-------------------|----------------|
| <b>Mean age in years (<math>\pm</math>SD)</b> | 30.8 ( $\pm$ 9.5) |                |
| 15-19                                         | 2,910             | 15.12          |
| 20-29                                         | 5,506             | 28.60          |
| 30-39                                         | 6,581             | 34.19          |
| 40-49                                         | 4,253             | 22.09          |
| <b>Marital status</b>                         |                   |                |
| Never married                                 | 4,683             | 24.33          |
| Currently married                             | 13,361            | 69.40          |
| Formerly married                              | 1,206             | 6.26           |
| <b>Occupation</b>                             |                   |                |
| Non-professional/Informal                     | 8,164             | 42.41          |
| Professional/Formal                           | 5,852             | 30.40          |
| Not working                                   | 5,234             | 27.19          |
| <b>Education</b>                              |                   |                |
| No education                                  | 2,226             | 11.56          |
| Primary                                       | 7,458             | 38.74          |
| Secondary                                     | 8,178             | 42.48          |
| Higher                                        | 1,389             | 7.22           |
| <b>Number of children born</b>                |                   |                |
| No birth                                      | 5,693             | 29.57          |
| 1-2 children                                  | 8,385             | 43.56          |
| $\geq$ 3 children                             | 5,173             | 26.87          |
| <b>Contraceptive use</b>                      |                   |                |
| Not use                                       | 10,909            | 56.67          |
| Hormonal                                      | 4,660             | 24.21          |
| Non-hormonal                                  | 3,681             | 19.12          |
| <b>Media exposure (Newspaper, radio, TV)</b>  |                   |                |
| None                                          | 10,319            | 53.60          |
| One                                           | 6,103             | 31.70          |
| $\geq$ Two                                    | 2,829             | 14.70          |
| <b>BMI (n=9,708)</b>                          |                   |                |
| Underweight                                   | 1,001             | 10.31          |
| Normal                                        | 5,918             | 60.96          |
| Overweight/Obese                              | 2,789             | 28.73          |
| <b>Alcohol drinking in the past 30 days</b>   |                   |                |
| Never drink                                   | 12,548            | 65.18          |
| Ever drink                                    | 3,583             | 18.61          |
| Current drink                                 | 3,119             | 16.20          |

|                                  |        |       |
|----------------------------------|--------|-------|
| <b>Smokes cigarettes</b>         |        |       |
| Non-smoker                       | 18,967 | 98.52 |
| Smoker                           | 284    | 1.48  |
| <b>Health insurance coverage</b> |        |       |
| No                               | 15,063 | 78.25 |
| Yes                              | 4,188  | 21.75 |
| <b>Wealth index</b>              |        |       |
| Poor                             | 6,787  | 35.26 |
| Middle                           | 3,788  | 19.68 |
| Rich                             | 8,676  | 45.07 |
| <b>Place of residence</b>        |        |       |
| Urban                            | 8,190  | 42.54 |
| Rural                            | 11,060 | 57.45 |
| <b>Geographical region*</b>      |        |       |
| Plain                            | 9,723  | 50.51 |
| Tonle Sap                        | 5,744  | 29.84 |
| Plateau/Mountain                 | 2,590  | 13.45 |
| Coastal                          | 1,194  | 6.20  |

**Notes:** Survey weights were applied to obtain weighted percentages. \***Plains:** Phnom Penh, Kampong Cham, Tbong Khmum, Kandal, Prey Veng, Svay Rieng, and Takeo; **Tonle Sap:** Banteay Meanchey, Kampong Chhnang, Kampong Thom, Pursat, Siem Reap, Battambang, Pailin, and Otdar Meanchey; **Coastal/sea:** Kampot, Kep, Preah Sihanouk, and Koh Kong; **Mountains:** Kampong Speu, Kratie, Preah Vihear, Stung Treng, Mondul Kiri, and Ratanak Kiri.

## Prevalence of breast and cervical screening among women and provincial distribution

Overall, 10.6% (95% CI: 9.7%-11.6%) of women had breast cancer screening by health providers, whereas cervical cancer screening was 15.3% (95% CI: 14.2%-16.6%). **Fig 1** indicates the province specific prevalence of breast cancer screening (**Map A**) and cervical cancer screening (**Map B**). The prevalence of breast cancer screening was the highest among women in Siem Reap (17.6%), followed by Phnom Penh (17.2%), Battambang (17.1%), Kampong Thom (15.3%), and the lowest in Kep (2.6%). The prevalence of cervical cancer screening was the highest among women in Phnom Penh (28.5%), followed by Kampong Thom (21.7%), Battambang (20.1%), and the lowest in Kampong Speu (3.1%).

**Fig 1.** Prevalence of breast cancer screening (**Map A**) and cervical cancer screening (**Map B**) among women by province. Shapefiles for administrative boundaries in Cambodia are publicly accessible through the DHS website at ([UR:https://spatialdata.dhsprogram.com/boundaries/#view=table&countryId=KH](https://spatialdata.dhsprogram.com/boundaries/#view=table&countryId=KH)).

## Factors associated with breast cancer screening in bivariate analysis



226  
227 **Table 2** shows the association between socio-demographic characteristics and behavioral factors  
228 and breast cancer screening. Women had a higher proportion of breast cancer screening among  
229 those aged 40-49 years (14.4%) than others (p-value <0.001). The women with professional jobs  
230 (15.2%) had higher education (22.4%) than other job categories (p-value <0.001). Also, women  
231 reported at least three children had a significantly higher experience with breast cancer screening  
232 (14.0%) than those with fewer children (p-value < 0.001); likewise, breast cancer screening was  
233 higher among women using non-hormonal contraceptives (18.7%) than those with hormonal use  
234 (p-value <0.001). Furthermore, following factors were found significantly associated with breast  
235 cancer screening: exposure to at least two types of media (16.0%) overweight and obese (14.2%)  
236 (p-value <0.001), report of never drinking alcohol (11.3%) (p-value = 0.003), non-smoker  
237 (11.3%) (p-value = 0.049), rich wealth quintile households (14.7%) (p-value <0.001), higher in  
238 urban areas than rural ones (13.1% vs 8.7%, p-value <0.001).

239

#### 240 **Factors associated with cervical cancer screening in bivariate analysis**

241

242 The study found a strong association between socio-demographic characteristics and behavioral  
243 factors and cervical cancer screening, as indicated in **Table 2**. Among women aged 40-49 years,  
244 there was a significantly greater proportion of breast cancer screening (23.2%) compared to other  
245 groups (p-value <0.001). This pattern was observed among formerly married women (20.2%) (p-  
246 value <0.001), those with professional occupations (23.7%), and those with higher levels of  
247 education (23.5%) (p-value <0.001). Also, women reported at least three children had a  
248 significantly higher experience with breast cancer screening (21.0%) than women with children  
249 less than 3 (p-value < 0.001). Similarly, the prevalence of breast cancer screening was higher  
250 among women who used non-hormonal contraceptives (29.3%) than those who used hormonal  
251 contraceptives (p-value < 0.001). Moreover, other factors that exhibited a significant association  
252 with cervical cancer screening included having exposure to at least two forms of media (22.3%),  
253 being overweight or obese (21.6%) (p-value <0.001), reporting current alcohol consumption  
254 (19.2%) (p-value 0.001), being a non-smoker (15.5%) (p-value 0.001), rich wealth quintile  
255 (22.3%) (p-value <0.001), and residing in urban areas as opposed to rural areas (20.1% vs 11.8%,  
256 p-value <0.001).

257

258 **Table 2.** Factors associated with breast and cervical cancer screening among women aged 15-49 years

259 (N=19,251)

| Variables                                    | (%) Breast cancer screening (n=2,039) | X <sup>2</sup> | P-value | (%) Cervical cancer screening (n=2,952) | X <sup>2</sup> | P-value |
|----------------------------------------------|---------------------------------------|----------------|---------|-----------------------------------------|----------------|---------|
| <b>Women's age in years</b>                  |                                       |                |         |                                         |                |         |
| 15-19                                        | 1.4                                   | 492.6          | <0.001  | 1.0                                     | 989.4          | <0.001  |
| 20-29                                        | 7.7                                   |                |         | 9.6                                     |                |         |
| 30-39                                        | 14.7                                  |                |         | 21.4                                    |                |         |
| 40-49                                        | 14.4                                  |                |         | 23.2                                    |                |         |
| <b>Marital status</b>                        |                                       |                |         |                                         |                |         |
| Never-married                                | 2.3                                   | 451.1          | <0.001  | 1.8                                     | 876.1          | <0.001  |
| Currently married                            | 13.2                                  |                |         | 19.7                                    |                |         |
| Formerly married                             | 14.0                                  |                |         | 20.2                                    |                |         |
| <b>Occupation</b>                            |                                       |                |         |                                         |                |         |
| Professional/Formal                          | 15.2                                  | 192.4          | <0.001  | 23.7                                    | 465.3          | <0.001  |
| Non-professional/Informal                    | 8.8                                   |                |         | 12.4                                    |                |         |
| Not working                                  | 8.1                                   |                |         | 10.5                                    |                |         |
| <b>Education</b>                             |                                       |                |         |                                         |                |         |
| No education                                 | 8.8                                   | 45.3           | <0.001  | 12.9                                    | 90.9           | <0.001  |
| Primary                                      | 10.8                                  |                |         | 15.8                                    |                |         |
| Secondary                                    | 10.0                                  |                |         | 14.2                                    |                |         |
| Higher                                       | 15.5                                  |                |         | 23.5                                    |                |         |
| <b>Number of children born</b>               |                                       |                |         |                                         |                |         |
| No birth                                     | 3.4                                   | 437.0          | <0.001  | 4.0                                     | 811.9          | <0.001  |
| 1-2 children                                 | 13.4                                  |                |         | 19.5                                    |                |         |
| ≥ 3 children                                 | 14.0                                  |                |         | 21.0                                    |                |         |
| <b>Contraceptive use</b>                     |                                       |                |         |                                         |                |         |
| Not use                                      | 7.9                                   | 305.7          | <0.001  | 11.0                                    | 715.8          | <0.001  |
| Hormonal                                     | 11.1                                  |                |         | 14.6                                    |                |         |
| Non-hormonal                                 | 18.1                                  |                |         | 29.3                                    |                |         |
| <b>Media exposure (Newspaper, radio, TV)</b> |                                       |                |         |                                         |                |         |
| None                                         | 8.9                                   | 106.8          | <0.001  | 13.0                                    | 152.0          | <0.001  |
| One                                          | 11.3                                  |                |         | 16.0                                    |                |         |
| Two or more                                  | 15.5                                  |                |         | 22.3                                    |                |         |
| <b>BMI (n=9,708)</b>                         |                                       |                |         |                                         |                |         |
| Underweight                                  | 5.3                                   | 62.7           | <0.001  | 6.3                                     | 148.5          | <0.001  |
| Normal                                       | 10.5                                  |                |         | 14.3                                    |                |         |
| Overweight/Obese                             | 14.2                                  |                |         | 21.6                                    |                |         |
| <b>Alcohol drinking in the past 30 days</b>  |                                       |                |         |                                         |                |         |
| Never drink                                  | 11.3                                  | 30.6           | 0.003   | 14.3                                    | 46.0           | <0.001  |
| Ever drink                                   | 8.0                                   |                |         | 15.7                                    |                |         |
| Current drink                                | 10.8                                  |                |         | 19.2                                    |                |         |
| <b>Smokes cigarettes</b>                     |                                       |                |         |                                         |                |         |
| Non-smoker                                   | 10.6                                  | 4.4            | 0.049   | 15.5                                    | 17.8           | <0.001  |
| Smoker                                       | 6.8                                   |                |         | 6.4                                     |                |         |
| <b>Health insurance coverage</b>             |                                       |                |         |                                         |                |         |
| No                                           | 10.5                                  | 1.1            | 0.472   | 15.0                                    | 6.6            | 0.112   |

|                                |      |       |        |      |       |        |
|--------------------------------|------|-------|--------|------|-------|--------|
| Yes                            | 11.0 |       |        | 16.6 |       |        |
| <b>Wealth index</b>            |      |       |        |      |       |        |
| Poor                           | 7.4  | 203.4 | <0.001 | 8.7  | 602.7 | <0.001 |
| Middle                         | 8.3  |       |        | 11.2 |       |        |
| Rich                           | 14.1 |       |        | 22.3 |       |        |
| <b>Place of residence</b>      |      |       |        |      |       |        |
| Urban                          | 13.1 | 94.5  | <0.001 | 20.1 | 253.5 | <0.001 |
| Rural                          | 8.7  |       |        | 11.8 |       |        |
| <b>Geographical of region*</b> |      |       |        |      |       |        |
| Tonle Sap                      | 13.6 | 158.0 | <0.001 | 16.6 | 282.7 | <0.001 |
| Plain                          | 10.7 |       |        | 17.8 |       |        |
| Coastal                        | 8.7  |       |        | 12.0 |       |        |
| Plateau/Mountain               | 4.6  |       |        | 4.8  |       |        |

260 **Notes:** Survey weights are applied to obtain weighted percentages. \***Plains:** Phnom Penh, Kampong Cham, Tbong Khmum, Kandal,  
 261 Prey Veng, Svay Rieng, and Takeo; **Tonle Sap:** Banteay Meanchey, Kampong Chhnang, Kampong Thom, Pursat, Siem Reap,  
 262 Battambang, Pailin, and Otdar Meanchey; **Coastal/sea:** Kampot, Kep, Preah Sihanouk, and Koh Kong; **Mountains:** Kampong Speu,  
 263 Kratie, Preah Vihear, Stung Treng, Mondul Kiri, and Ratanak Kiri.

264

265

## 266 **Factors associated with breast cancer screening in multiple logistic regression**

267

268 As shown in **Table 3**, several factors were independently associated with increased odds of  
 269 having breast cancer screening among women. These factors included age group 20-29 years  
 270 [AOR=2.51; 95% CI: 1.55-4.06], 30-39 years [AOR=4.34; 95% CI: 2.66-7.09], and 40-49 years  
 271 [AOR=4.66; 95% CI: 2.81-7.71], currently married [AOR=2.67; 95% CI: 1.79-3.97], formerly  
 272 married [AOR=3.16; 95% CI: 1.93-5.17], completed secondary education [AOR=1.44; 95% CI:  
 273 1.12-1.85], higher education [AOR=1.92; 95% CI: 1.26-2.93], using non-hormonal contraceptive  
 274 [AOR=1.34; 95% CI: 1.08-1.65], exposure media at least two types [AOR=1.66; 95% CI: 1.32-  
 275 2.10], and rich wealth quintile [AOR=1.50; 95% CI: 1.25-1.80]. On the contrary, women  
 276 reporting ever alcohol consumption [AOR=0.55; 95% CI: 0.45-0.66], and those reporting current  
 277 alcohol drinking were associated with lower odds of having breast cancer screening [AOR=0.75;  
 278 95% CI: 0.63-0.89].

279

## 280 **Factors associated with cervical cancer screening in multiple logistic regression**

281

282 Similarly, following factors were independently associated with increased odds of having  
 283 cervical cancer screening among women: age group 20-29 years [AOR=2.88; 95% CI: 1.76-  
 284 4.71], 30-39 years [AOR=5.94; 95% CI: 3.58-9.83], and 40-49 years [AOR=7.61; 95% CI: 4.55-  
 285 12.73], currently married [AOR=5.38; 95% CI: 3.52-8.21], formerly married [AOR=5.69; 95%

286 CI: 3.70-8.74], working in the professional and/or formal jobs [AOR=1.38; 1.14-1.66],  
 287 completed secondary education [AOR=1.34; 95% CI: 1.09-1.65], had higher education  
 288 [AOR=1.55; 95% CI: 1.55-2.73], using non-hormonal contraceptive [AOR=1.46; 95% CI: 1.29-  
 289 1.66], exposure media at least two types [AOR=1.62; 95% CI: 1.35-1.95], and rich wealth  
 290 quintile [AOR=2.14; 95% CI: 1.78-2.58]. On the contrary, women reported smoking cigarettes  
 291 was associated with lower odds of having cervical cancer screening [AOR=0.43; 95% CI: 0.2-  
 292 0.72] (**Table 3**).

293  
 294 **Table 3.** Factors independently associated with breast and cervical cancer screening among  
 295 women aged 15-49 years: Multivariate logistic regression  
 296

| Variables                                    | Breast cancer screening<br>(N=19,251) |             | Cervical cancer screening<br>(N=19,251) |              |
|----------------------------------------------|---------------------------------------|-------------|-----------------------------------------|--------------|
|                                              | AOR                                   | 95% CI      | AOR                                     | 95% CI       |
| <b>Women's age in years</b>                  |                                       |             |                                         |              |
| 15-19                                        | Ref.                                  | Ref.        | Ref.                                    | Ref.         |
| 20-29                                        | 2.51 <sup>***</sup>                   | [1.55-4.06] | 2.88 <sup>***</sup>                     | [1.76-4.71]  |
| 30-39                                        | 4.34 <sup>***</sup>                   | [2.66-7.09] | 5.94 <sup>***</sup>                     | [3.58-9.83]  |
| 40-49                                        | 4.66 <sup>***</sup>                   | [2.81,7.71] | 7.61 <sup>***</sup>                     | [4.55-12.73] |
| <b>Marital status</b>                        |                                       |             |                                         |              |
| Never-married                                | Ref.                                  | Ref.        | Ref.                                    | Ref.         |
| Currently married                            | 2.67 <sup>***</sup>                   | [1.79-3.97] | 5.38 <sup>***</sup>                     | [3.52-8.21]  |
| Formerly married                             | 3.16 <sup>***</sup>                   | [1.93-5.17] | 5.69 <sup>***</sup>                     | [3.70-8.74]  |
| <b>Occupation</b>                            |                                       |             |                                         |              |
| Not working                                  | Ref.                                  | Ref.        | Ref.                                    | Ref.         |
| Professional/Formal                          | 1.20                                  | [0.99-1.47] | 1.38 <sup>***</sup>                     | [1.14-1.66]  |
| Non-professional/Informal                    | 0.89                                  | [0.73-1.09] | 0.94                                    | [0.79-1.12]  |
| <b>Education</b>                             |                                       |             |                                         |              |
| No education                                 | Ref.                                  | Ref.        | Ref.                                    | Ref.         |
| Primary                                      | 1.19                                  | [0.94-1.52] | 1.14                                    | [0.94-1.38]  |
| Secondary                                    | 1.44 <sup>**</sup>                    | [1.12-1.85] | 1.34 <sup>**</sup>                      | [1.09-1.65]  |
| Higher                                       | 1.92 <sup>**</sup>                    | [1.26,2.93] | 2.06 <sup>***</sup>                     | [1.55-2.73]  |
| <b>Number of children born</b>               |                                       |             |                                         |              |
| No birth                                     | Ref.                                  | Ref.        | Ref.                                    | Ref.         |
| 1-2 children                                 | 1.36                                  | [0.92-2.02] | 1.31                                    | [0.99-1.75]  |
| ≥ 3 children                                 | 1.38                                  | [0.94-2.03] | 1.31                                    | [0.94-1.82]  |
| <b>Contraceptive use</b>                     |                                       |             |                                         |              |
| Not use                                      | Ref.                                  | Ref.        | Ref.                                    | Ref.         |
| Hormonal                                     | 0.97                                  | [0.80-1.19] | 0.83 <sup>*</sup>                       | [0.70-0.98]  |
| Non-hormonal                                 | 1.34 <sup>**</sup>                    | [1.08-1.65] | 1.46 <sup>***</sup>                     | [1.23-1.73]  |
| <b>Media exposure (Newspaper, radio, TV)</b> |                                       |             |                                         |              |
| None                                         | Ref.                                  | Ref.        | Ref.                                    | Ref.         |
| One                                          | 1.20 <sup>*</sup>                     | [1.04-1.39] | 1.09                                    | [0.96-1.24]  |
| ≥ Two                                        | 1.66 <sup>***</sup>                   | [1.32-2.10] | 1.62 <sup>***</sup>                     | [1.35-1.95]  |
| <b>Alcohol drinking in the past 30 days</b>  |                                       |             |                                         |              |
| Never drink                                  | Ref.                                  | Ref.        | Ref.                                    | Ref.         |
| Ever drink                                   | 0.55 <sup>***</sup>                   | [0.45-0.66] | 0.90                                    | [0.75-1.08]  |
| Current drink                                | 0.75 <sup>**</sup>                    | [0.63-0.89] | 1.12                                    | [0.95-1.31]  |
| <b>Smokes cigarettes</b>                     |                                       |             |                                         |              |

|                                  |         |             |         |             |
|----------------------------------|---------|-------------|---------|-------------|
| Non-smoker                       | Ref.    | Ref.        | Ref.    | Ref.        |
| Smoker                           | 0.72    | [0.43-1.19] | 0.43**  | [0.26-0.72] |
| <b>Health insurance coverage</b> |         |             |         |             |
| No                               | Ref.    | Ref.        | Ref.    | Ref.        |
| Yes                              | 0.96    | [0.82-1.13] | 1.00    | [0.86-1.17] |
| <b>Household wealth index</b>    |         |             |         |             |
| Poor                             | Ref.    | Ref.        | Ref.    | Ref.        |
| Middle                           | 1.00    | [0.82-1.23] | 1.14    | [0.95-1.36] |
| Rich                             | 1.50*** | [1.25-1.80] | 2.14*** | [1.78-2.58] |
| <b>Place of residence</b>        |         |             |         |             |
| Rural                            | Ref.    | Ref.        | Ref.    | Ref.        |
| Urban                            | 0.87    | [0.73-1.03] | 0.85*   | [0.73-1.00] |

297

298

299

\*  $p < 0.05$ , \*\*  $p < 0.01$ , \*\*\*  $p < 0.001$

## 300 **Discussion**

301  
302 The study highlights the relatively low proportion of breast cancer screening (10.6%), and  
303 cervical cancer screening (15.3%) respectively, compared to some Asian countries such as  
304 Thailand (46%-59%) and China (17%-26%) but comparable to Indonesia and India [11]. The  
305 study was consistent with a previous study that indicated that most women had performed more  
306 cervical cancer screening than breast cancer screening especially in low and middle-income  
307 countries [34]. The main reason may be due to the awareness and concern about cervical cancer  
308 among women rather than the breast cancer despite the prevalence of breast cancer being  
309 relatively higher than cervical cancer [35]. Also, it may be explained by the available national  
310 cancer screening guidelines focusing on cervical cancer screening [21,36]. Additionally,  
311 awareness about breast self-examination (BSE) in Cambodia was limited. Approximately 60% of  
312 Cambodian women were unaware of BSE [37]. Moreover, cancer screening uptake remained low  
313 compared to screening rates of above 50% in developed countries [35]. Therefore, strengthening  
314 cancer screening in Cambodia requires ongoing efforts.

315  
316 Overall, socio-economic factors were associated with breast and cervical cancer screening  
317 [38,39]. For example, in our study, the odds of breast cancer screening increased with ages and  
318 the highest in age 40-49 years. This corroborates previous studies showing that women aged 40  
319 years and above are at a greater risk of developing breast cancer [40,41]. Consequently, women  
320 aged 35-39 should undergo routine mammography to enhance the early detection of breast  
321 cancer at least at the interval of 1-3 years and annually for women aged 40 years and older [41].  
322 Similarly, the odds of being screened for cervical cancer increased with the women's age too,  
323 especially among those aged 40-49 years, which is commonly consistent with other studies after  
324 years of women's being sexually active [34,42,43]. The American Cancer Society (ACS)  
325 recommends that women aged 25 should undergo cervical cancer screening and be tested for  
326 HPV every five years through age 65 years [44]. Women with higher education levels were more  
327 likely to increase the odds of breast cancer and cervical screening than those without formal  
328 education, being consistent with previous studies [38,39]. Moreover, contextual factors such as  
329 less educated women living in remote areas may contribute to the less screening [45,46].  
330 Similarly, women from rich families and professional or formal employment were more likely to  
331 have received breast or cervical cancer screening. These findings are consistent with the results

332 of other international studies [39,47]. A possible reason could be that women with strong  
333 financial backing are more likely to afford preventive care services, including breast cancer and  
334 cervical cancer screening, which may not be the case for women of the lowest economic status  
335 [48]. Another finding worth commenting on is the higher odds of breast cancer and cervical  
336 cancer screening among women exposed to the media (e.g., Newspaper, radio, TV) at least once  
337 a week compared to those not exposed at all. Therefore, intensive publicity and educational  
338 programs on various mass media platforms on the health benefits of periodic breast examinations  
339 for early detection and treatment had the potential to improve breast cancer screening behavior  
340 among women by building on their awareness levels.

341

### 342 **Limitation**

343  
344 This study has a few limitations. First, the data were cross-sectional, preventing any causal  
345 inference between the explanatory and outcome measures. Secondly, since we used existing data,  
346 some variables must be added to the dataset—for instance, knowledge and attitude regarding  
347 cancer preventive services and frequency of screening. Thirdly, the examination of breast and  
348 cervical cancer data was collected as self-reported by the women, which may make our analysis  
349 prone to information bias as underestimated. Despite these limitations, this study is the first to  
350 assess the socio-economic and behavioral factors associated with breast and cervical cancer  
351 screening in a nationally-representative sample of women of reproductive age 15-49 years in  
352 Cambodia. Furthermore, the study provides important insights regarding the prevalence and  
353 socio-demographic factors of breast cancer and cervical screening services with the nationally  
354 representative sample. The findings from this study could be valuable for researchers, clinicians  
355 and health policymakers to engage more in developing effective strategies for promoting breast  
356 and cervical cancer screening services, awareness among women from different socio-  
357 demographic groups since it has played a pivotal role in improving early detection and screening  
358 practices. Health policymakers should prioritize health promotion interventions target women  
359 living in rural areas, women without formal education, especially in the poor wealth quintile.

### 360 361 **Conclusion**

362

363 This study shows the relative lower screening proportion for both breast and cervical cancers  
364 among Cambodian women reproductive age; and it also highlights that socio-demographic  
365 factors are significantly important in determining the of breast and cervical screening services  
366 among women aged 15-49 years. The findings emphasize the need for targeted awareness  
367 campaigns, continued efforts in health promotion and education, and comprehensive  
368 interventions to address these socio-demographic disparities breast and cervical cancer  
369 screenings practices. Further studies are therefore necessary to generate a better picture of the  
370 situation, including the quality of the health service and factors associated with the accessibility  
371 of the available services.

372

### 373 **Acknowledgments**

374 The authors would like to thank DHS-ICF, who approved the data use for this paper.

375

### 376 **Abbreviations**

377 ACS; American Cancer Society, AOR; Adjusted odds ratio, BMI; Body mass index, CDHS; Cambodia  
378 Demographic Health Survey, EA; Enumeration areas, HPV; Human papillomavirus, NCDs;  
379 Noncommunicable diseases, PPS; Probability proportional to size, VIA; Visual inspection with acetic acid,  
380 WRA; Women at reproductive age, WHO; World Health Organization.

381

### 382 **References**

383

384 1. Ferlay J, Ervik M, Lam F, Colombet M, Mery L, Piñeros M, et al. Global cancer observatory: cancer  
385 today. Lyon: International Agency for Research on Cancer; 2020. 2021.

386 2. Ginsburg O, Bray F, Coleman MP, Vanderpuye V, Eniu A, Kotha SR, et al. The global burden of  
387 women's cancers: a grand challenge in global health. *Lancet* (London, England). 2017;389(10071):847-60.  
388 Epub 2016/11/07. doi: 10.1016/s0140-6736(16)31392-7. PubMed PMID: 27814965; PubMed Central  
389 PMCID: PMC6191029.

390 3. Global, regional, and national incidence, prevalence, and years lived with disability for 301 acute  
391 and chronic diseases and injuries in 188 countries, 1990-2013: a systematic analysis for the Global  
392 Burden of Disease Study 2013. *Lancet* (London, England). 2015;386(9995):743-800. Epub 2015/06/13.  
393 doi: 10.1016/s0140-6736(15)60692-4. PubMed PMID: 26063472; PubMed Central PMCID:  
394 PMCPmc4561509.

395 4. Bray F, Ferlay J, Soerjomataram I, Siegel RL, Torre LA, Jemal A. Global cancer statistics 2018:  
396 GLOBOCAN estimates of incidence and mortality worldwide for 36 cancers in 185 countries. *CA Cancer*  
397 *J Clin*. 2018;68(6):394-424. Epub 2018/09/13. doi: 10.3322/caac.21492. PubMed PMID: 30207593.



- 398 5. Lim YX, Lim ZL, Ho PJ, Li J. Breast Cancer in Asia: Incidence, Mortality, Early Detection,  
399 Mammography Programs, and Risk-Based Screening Initiatives. *Cancers*. 2022;14(17). Epub 2022/09/10.  
400 doi: 10.3390/cancers14174218. PubMed PMID: 36077752; PubMed Central PMCID: PMCPmc9454998.
- 401 6. World Health Organization. Cancer - Screening and early detection 2010 [cited 2023 July]. Available  
402 from: [https://www.who.int/europe/news-room/fact-sheets/item/cancer-screening-and-early-detection-of-](https://www.who.int/europe/news-room/fact-sheets/item/cancer-screening-and-early-detection-of-cancer)  
403 [cancer](https://www.who.int/europe/news-room/fact-sheets/item/cancer-screening-and-early-detection-of-cancer).
- 404 7. Machii R, Takahashi H. Japanese cancer screening programs during the COVID-19 pandemic:  
405 Changes in participation between 2017-2020. *Cancer epidemiology*. 2023;82:102313. Epub 2022/12/13.  
406 doi: 10.1016/j.canep.2022.102313. PubMed PMID: 36508964; PubMed Central PMCID:  
407 PMCPmc9726684.
- 408 8. Ma ZQ, Richardson LC. Cancer Screening Prevalence and Associated Factors Among US Adults.  
409 *Preventing chronic disease*. 2022;19:E22. Epub 2022/04/22. doi: 10.5888/pcd19.220063. PubMed PMID:  
410 35446757; PubMed Central PMCID: PMCPmc9044902.
- 411 9. Autier P, Sullivan R. Population Screening for Cancer in High-Income Settings: Lessons for Low-  
412 and Middle-Income Economies. *J Glob Oncol*. 2019;5:1-5. Epub 2019/02/05. doi: 10.1200/jgo.18.00235.  
413 PubMed PMID: 30715958; PubMed Central PMCID: PMCPmc6426516.
- 414 10. Ouahnnon L, Rougé Bugat ME, Lamy S, Druel V, Delpierre C, Grosclaude P. Social and territorial  
415 inequalities in breast and cervical cancers screening uptake: a cross-sectional study in France. *BMJ Open*.  
416 2022;12(2):e055363. Epub 2022/02/24. doi: 10.1136/bmjopen-2021-055363. PubMed PMID: 35193917;  
417 PubMed Central PMCID: PMCPmc8867371.
- 418 11. Aoki ES, Yin R, Li K, Bhatla N, Singhal S, Ocviyanti D, et al. National screening programs for  
419 cervical cancer in Asian countries. *Journal of gynecologic oncology*. 2020;31(3):e55. Epub 2020/04/09.  
420 doi: 10.3802/jgo.2020.31.e55. PubMed PMID: 32266804; PubMed Central PMCID: PMCPmc7189071.
- 421 12. Schliemann D, Hoe WMK, Mohan D, Allotey P, Reidpath DD, Tan MM, et al. Challenges and  
422 opportunities for breast cancer early detection among rural dwelling women in Segamat District, Malaysia:  
423 A qualitative study. *PloS one*. 2022;17(5):e0267308. Epub 2022/05/20. doi: 10.1371/journal.pone.0267308.  
424 PubMed PMID: 35594267; PubMed Central PMCID: PMCPmc9122189.
- 425 13. Jemal A, Bray F, Center MM, Ferlay J, Ward E, Forman D. Global cancer statistics. *CA: a cancer*  
426 *journal for clinicians*. 2011;61(2):69-90.
- 427 14. Dey S. Preventing breast cancer in LMICs via screening and/or early detection: The real and the  
428 surreal. *World journal of clinical oncology*. 2014;5(3):509.
- 429 15. Toan DTT, Son DT, Hung LX, Minh LN, Mai DL, Hoat LN. Knowledge, attitude, and practice  
430 regarding breast cancer early detection among women in a mountainous area in Northern Vietnam. *Cancer*  
431 *Control*. 2019;26(1):1073274819863777.
- 432 16. Ministry of Health and Family Welfare. Operational Framework: Management of Common Cancers  
433 2016. Available from: [http://cancerindia.org.in/wp-](http://cancerindia.org.in/wp-content/uploads/2017/11/Operational_Framework_Management_of_Common_Cancers.pdf)  
434 [content/uploads/2017/11/Operational\\_Framework\\_Management\\_of\\_Common\\_Cancers.pdf](http://cancerindia.org.in/wp-content/uploads/2017/11/Operational_Framework_Management_of_Common_Cancers.pdf).
- 435 17. Huang Y, Tong Z, Chen K, Wang Y, Liu P, Gu L, et al. Interpretation of breast cancer screening  
436 guideline for Chinese women. *Cancer biology & medicine*. 2019;16(4):825.
- 437 18. Majeed AI, Hafeez A, Khan SA. Strengthening Breast Cancer Screening Mammography Services in  
438 Pakistan Using Islamabad Capital Territory as a Pilot Public Health Intervention. *Healthcare (Basel,*  
439 *Switzerland)*. 2022;10(6). Epub 2022/06/25. doi: 10.3390/healthcare10061106. PubMed PMID: 35742157;  
440 PubMed Central PMCID: PMCPmc9223128.
- 441 19. Srinath A, van Merode F, Rao SV, Pavlova M. Barriers to cervical cancer and breast cancer  
442 screening uptake in low- and middle-income countries: a systematic review. *Health policy and planning*.  
443 2023;38(4):509-27. Epub 2022/12/17. doi: 10.1093/heapol/czac104. PubMed PMID: 36525529; PubMed  
444 Central PMCID: PMCPmc10089064.
- 445 20. National Institute of Statistics PP, Cambodia, Ministry of Health Phnom Penh, Cambodia, The DHS  
446 Program, ICF, Rockville, Maryland, USA. Cambodia Demographic and Health Survey 2021–22. Phnom  
447 Penh, Cambodia, and Rockville, Maryland, USA: NIS, MoH, and ICF. 2022.

- 448 21. Ministry of Health Cambodia. National Strategy for the Prevention and Control of  
449 Noncommunicable Disease 2007-2010 [cited June 2023]. Available from:  
450 [https://www.ghdonline.org/uploads/Cambodia\\_NCD\\_Strategy\\_2007-10.pdf](https://www.ghdonline.org/uploads/Cambodia_NCD_Strategy_2007-10.pdf).
- 451 22. Ministry of Health Cambodia. National Action Plan for Cervical Cancer Prevention and Control  
452 2019-2023. 2019. Available from: [https://www.iccp-](https://www.iccp-portal.org/system/files/plans/KHM_B5_MIIB5%20NAP-CCPT%202019%20EN.pdf)  
453 [portal.org/system/files/plans/KHM\\_B5\\_MIIB5%20NAP-CCPT%202019%20EN.pdf](https://www.iccp-portal.org/system/files/plans/KHM_B5_MIIB5%20NAP-CCPT%202019%20EN.pdf).
- 454 23. Ueda Y, Kawana K, Yanaihara N, Banno K, Chhit M, Uy K, et al. Development and evaluation of a  
455 cervical cancer screening system in Cambodia: A collaborative project of the Cambodian Society of  
456 Gynecology and Obstetrics and Japan Society of Obstetrics and Gynecology. *The journal of obstetrics and*  
457 *gynaecology research*. 2019;45(7):1260-7. Epub 2019/04/13. doi: 10.1111/jog.13968. PubMed PMID:  
458 30977232; PubMed Central PMCID: PMC6618121.
- 459 24. Touch S, Oh JK. Knowledge, attitudes, and practices toward cervical cancer prevention among  
460 women in Kampong Speu Province, Cambodia. *BMC cancer*. 2018;18(1):294. Epub 2018/03/17. doi:  
461 10.1186/s12885-018-4198-8. PubMed PMID: 29544466; PubMed Central PMCID: PMC6618121.
- 462 25. Garon J, Wuddhika IV, Sreenivasan N, Wannemuehler K, Vutthikol Y, Chhorvann C, et al.  
463 Community-based household assessment of human papillomavirus (HPV) vaccination coverage and  
464 acceptability - HPV vaccine demonstration program, Cambodia - 2017. *Vaccine*. 2019;37(9):1202-8.  
465 Epub 2019/01/29. doi: 10.1016/j.vaccine.2018.12.052. PubMed PMID: 30686637; PubMed Central  
466 PMCID: PMC6372342.
- 467 26. Phaswana-Mafuya N, Peltzer K. Breast and Cervical Cancer Screening Prevalence and Associated  
468 Factors among Women in the South African General Population. *Asian Pac J Cancer Prev*.  
469 2018;19(6):1465-70. Epub 2018/06/25. doi: 10.22034/apjcp.2018.19.6.1465. PubMed PMID: 29936716;  
470 PubMed Central PMCID: PMC6103566.
- 471 27. Narayan A, Fischer A, Zhang Z, Woods R, Morris E, Harvey S. Nationwide cross-sectional  
472 adherence to mammography screening guidelines: national behavioral risk factor surveillance system  
473 survey results. *Breast Cancer Res Treat*. 2017;164(3):719-25. Epub 2017/05/15. doi: 10.1007/s10549-017-  
474 4286-5. PubMed PMID: 28508184.
- 475 28. Serral G, Borrell C, Puigpinós IRR. [Socioeconomic inequalities in mammography screening in  
476 Spanish women aged 45 to 69]. *Gac Sanit*. 2018;32(1):61-7. Epub 2017/03/06. doi:  
477 10.1016/j.gaceta.2016.12.010. PubMed PMID: 28274621.
- 478 29. Lamichhane B, Adhikari B, Poudel L, Pandey AR, Kakchhapati S, K CS, et al. Factors associated  
479 with uptake of breast and cervical cancer screening among Nepalese women: Evidence from Nepal  
480 Demographic and Health Survey 2022. *PLOS global public health*. 2024;4(3):e0002971. Epub 2024/03/11.  
481 doi: 10.1371/journal.pgph.0002971. PubMed PMID: 38466682; PubMed Central PMCID:  
482 PMC610927089.
- 483 30. Theme Filha MM, Leal MD, Oliveira EF, Esteves-Pereira AP, Gama SG. Regional and social  
484 inequalities in the performance of Pap test and screening mammography and their correlation with  
485 lifestyle: Brazilian national health survey, 2013. *Int J Equity Health*. 2016;15(1):136. Epub 2016/11/17. doi:  
486 10.1186/s12939-016-0430-9. PubMed PMID: 27852313; PubMed Central PMCID: PMC5112710.
- 487 31. Asare M, Flannery M, Kamen C. Social Determinants of Health: A Framework for Studying Cancer  
488 Health Disparities and Minority Participation in Research. *Oncol Nurs Forum*. 2017;44(1):20-3. doi:  
489 10.1188/17.Onf.20-23. PubMed PMID: 28060469; PubMed Central PMCID: PMC5583708.
- 490 32. Um S, Yom A, J AM, Sopheab H. Overweight and obesity among women at reproductive age in  
491 Cambodia: Data analysis of Cambodia Demographic and Health Survey 2014. *PLOS global public health*.  
492 2023;3(3):e0001768. Epub 2023/04/01. doi: 10.1371/journal.pgph.0001768. PubMed PMID: 37000710;  
493 PubMed Central PMCID: PMC665241.
- 494 33. Midi H, Sarkar SK, Rana S. Collinearity diagnostics of binary logistic regression model. *Journal of*  
495 *interdisciplinary mathematics*. 2010;13(3):253-67.
- 496 34. Keetile M, Ndlovu K, Letamo G, Disang M, Yaya S, Navaneetham K. Factors associated with and  
497 socioeconomic inequalities in breast and cervical cancer screening among women aged 15-64 years in

- 498 Botswana. PloS one. 2021;16(8):e0255581. Epub 2021/08/05. doi: 10.1371/journal.pone.0255581.  
499 PubMed PMID: 34347841; PubMed Central PMCID: PMCPCmc8336819.
- 500 35. Globocan 2020. Primary and secondary prevention of cancer: response by country [July 2023].  
501 Available from: <https://apps.who.int/gho/data/view.main.24766>.
- 502 36. Ministry of Health Cambodia. National Strategic Plan for the Prevention and Control of  
503 Noncommunicable Diseases 2013-2020 [cited June 2023]. Available from: [https://www.iccp-portal.org/system/files/plans/KHM\\_B3\\_NSP-NCD%202013-2020\\_Final%20approved.pdf](https://www.iccp-portal.org/system/files/plans/KHM_B3_NSP-NCD%202013-2020_Final%20approved.pdf).
- 504 37. Vorn R, Ryu E, Srun S, Chang S, Suh I, Kim W. Breast and cervical cancer screening for risk  
505 assessment in Cambodian women. Journal of obstetrics and gynaecology : the journal of the Institute of  
506 Obstetrics and Gynaecology. 2020;40(3):395-400. Epub 2020/02/25. doi:  
507 10.1080/01443615.2019.1633515. PubMed PMID: 32091288.
- 508 38. Damiani G, Basso D, Acampora A, Bianchi CB, Silvestrini G, Frisicale EM, et al. The impact of  
509 level of education on adherence to breast and cervical cancer screening: Evidence from a systematic  
510 review and meta-analysis. Prev Med. 2015;81:281-9. Epub 2015/09/27. doi:  
511 10.1016/j.ypmed.2015.09.011. PubMed PMID: 26408405.
- 512 39. Akinyemiju T, Ogunsina K, Sakhujia S, Ogbhodo V, Braithwaite D. Life-course socioeconomic status  
513 and breast and cervical cancer screening: analysis of the WHO's Study on Global Ageing and Adult  
514 Health (SAGE). BMJ Open. 2016;6(11):e012753. Epub 2016/11/25. doi: 10.1136/bmjopen-2016-012753.  
515 PubMed PMID: 27881528; PubMed Central PMCID: PMCPCmc5129035.
- 516 40. Melnikow J, Henderson JT, Burda BU, Senger CA, Durbin S, Weyrich MS. Screening for Cervical  
517 Cancer With High-Risk Human Papillomavirus Testing: Updated Evidence Report and Systematic  
518 Review for the US Preventive Services Task Force. Jama. 2018;320(7):687-705. Epub 2018/08/25. doi:  
519 10.1001/jama.2018.10400. PubMed PMID: 30140883.
- 520 41. Kmietowicz Z. Women aged over 40 who are at increased risk of breast cancer should get annual  
521 mammograms. BMJ (Clinical research ed). 2004;328(7455):1515. Epub 2004/06/26. doi:  
522 10.1136/bmj.328.7455.1515. PubMed PMID: 15217851; PubMed Central PMCID: PMCPCmc437135.
- 523 42. Smith JS, Melendy A, Rana RK, Pimenta JM. Age-specific prevalence of infection with human  
524 papillomavirus in females: a global review. The Journal of adolescent health : official publication of the  
525 Society for Adolescent Medicine. 2008;43(4 Suppl):S5-25, S.e1-41. Epub 2008/10/01. doi:  
526 10.1016/j.jadohealth.2008.07.009. PubMed PMID: 18809145.
- 527 43. Lin S, Gao K, Gu S, You L, Qian S, Tang M, et al. Worldwide trends in cervical cancer incidence  
528 and mortality, with predictions for the next 15 years. Cancer. 2021;127(21):4030-9. Epub 2021/08/10. doi:  
529 10.1002/cncr.33795. PubMed PMID: 34368955.
- 530 44. Fontham ETH, Wolf AMD, Church TR, Etzioni R, Flowers CR, Herzig A, et al. Cervical cancer  
531 screening for individuals at average risk: 2020 guideline update from the American Cancer Society. CA  
532 Cancer J Clin. 2020;70(5):321-46. Epub 2020/07/31. doi: 10.3322/caac.21628. PubMed PMID: 32729638.
- 533 45. National Institute of Statistics (NIS). General population census of the Kingdom of Cambodia 2019  
534 (2020) [cited November 2021]. Available from:  
535 <https://www.nis.gov.kh/nis/Census2019/Final%20General%20Population%20Census%202019-English.pdf>.
- 536 46. National Institute of Statistics (NIS). Report of Cambodia Socio-Economic Survey 2019-2020 2020  
537 [cited 2023 July]. Available from:  
538 [https://www.nis.gov.kh/nis/CSSES/Final%20Report%20of%20Cambodia%20Socio-Economic%20Survey%202019-20\\_EN.pdf](https://www.nis.gov.kh/nis/CSSES/Final%20Report%20of%20Cambodia%20Socio-Economic%20Survey%202019-20_EN.pdf).
- 539 47. Damiani G, Federico B, Basso D, Ronconi A, Bianchi CB, Anzellotti GM, et al. Socioeconomic  
540 disparities in the uptake of breast and cervical cancer screening in Italy: a cross sectional study. BMC  
541 Public Health. 2012;12:99. Epub 2012/02/07. doi: 10.1186/1471-2458-12-99. PubMed PMID: 22305108;  
542 PubMed Central PMCID: PMCPCmc3314546.
- 543 48. screening Wppom. Available from: <https://www.who.int/publications/i/item/who-position-paper-on-mammography-screening>.
- 544  
545  
546  
547



# Map A

medRxiv preprint doi: <https://doi.org/10.1101/2023.12.05.23299477>; this version posted March 31, 2024. The copyright holder for this preprint (which was not certified by peer review) is the author/funder, who has granted medRxiv a license to display the preprint in perpetuity. It is made available under a [CC-BY 4.0 International license](https://creativecommons.org/licenses/by/4.0/).

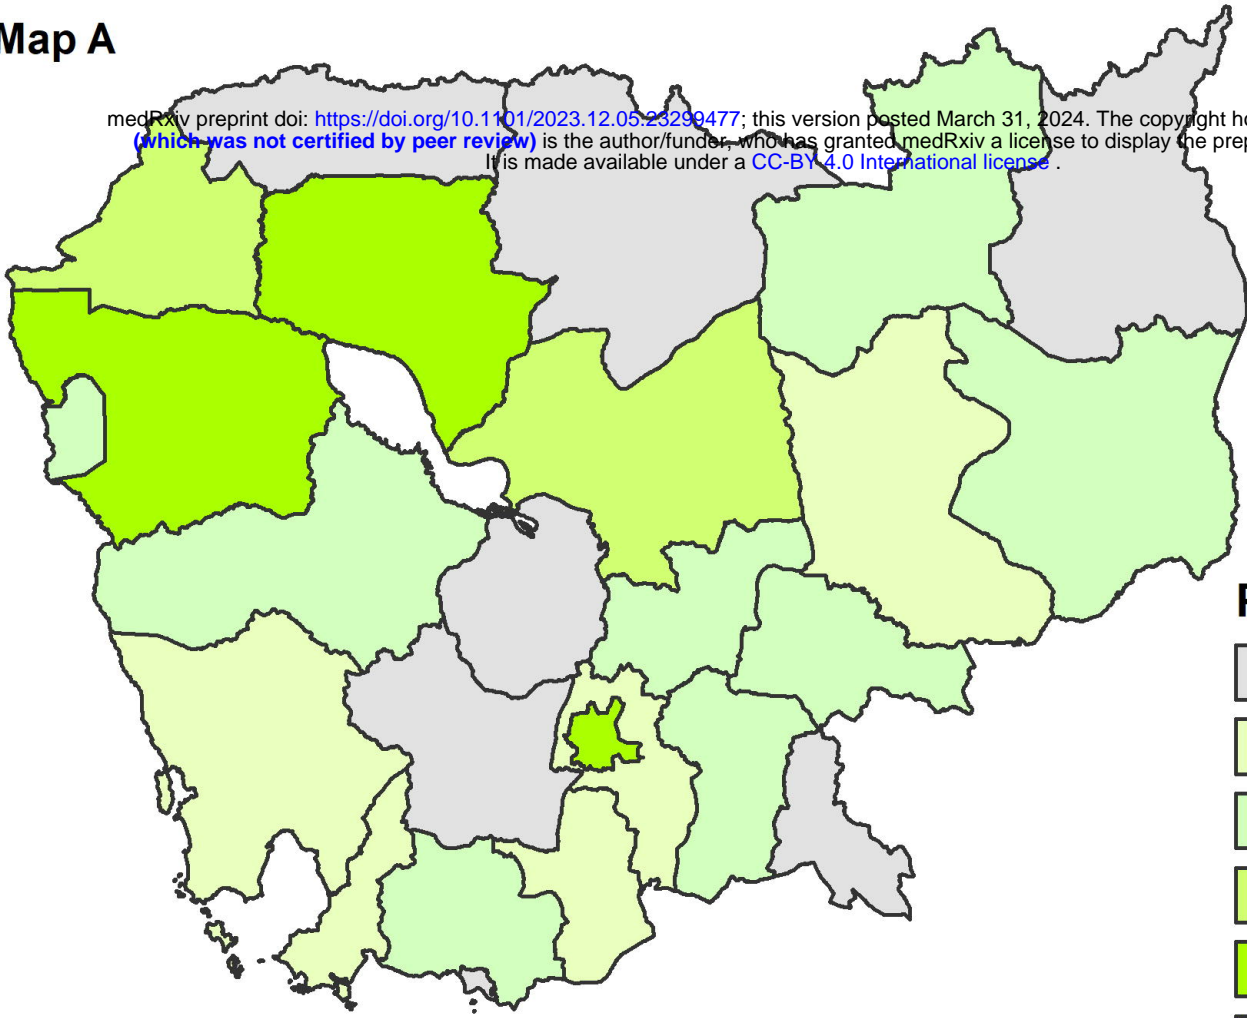

# Map B

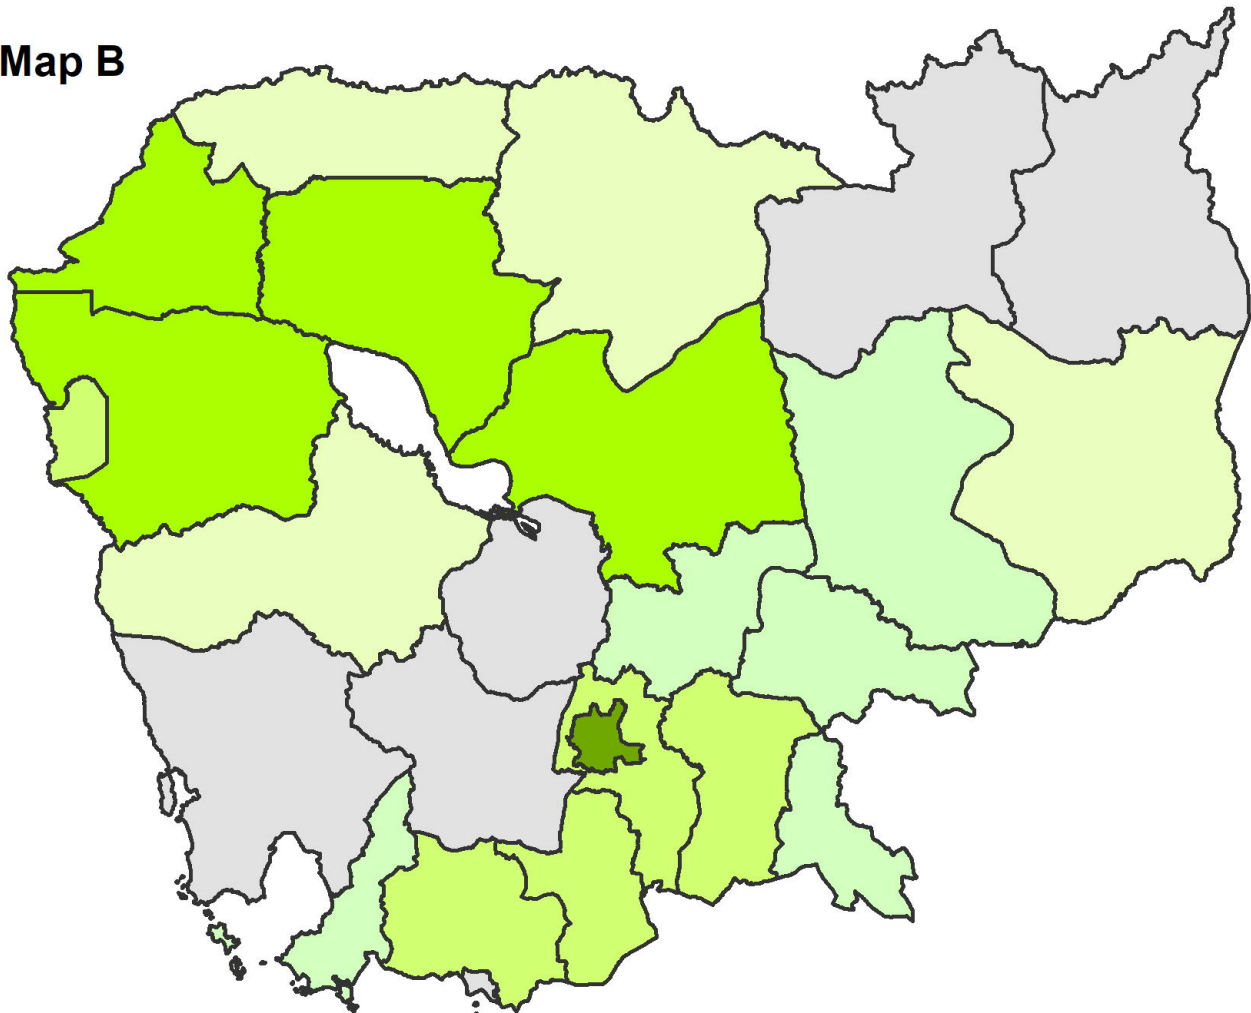

## Percent

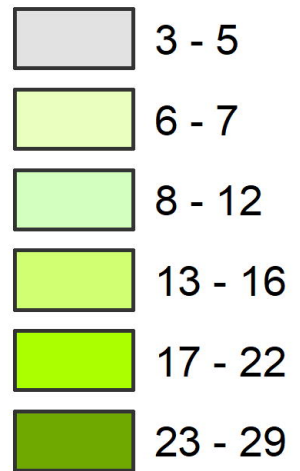

Source: https://medrxiv.org/content/10.1101/2023.12.05.23299477v2.full.pdf
